# Supplementary material
Source: HighWire-hosted journal article supplement (https://bmjpaedsopen.bmj.com/content/2/1/e000369)
Supplement: inline-supplementary-material-1 [file inline-supplementary-material-1.docx]

**Summary of Search**

| **Database** | **Date Searched** | **Number Retrieved** | **After Duplicate Removal** |
| --- | --- | --- | --- |
| Cochrane Central Register of Controlled Trials (Wiley) | November 4, 2013 | 2343 | 2296 |
| **Total** |  | **2343** | **2296** |

Database: Cochrane Central Register of Controlled Trials (Wiley)

Date Searched: 4 November 2013 at 21:07:57.057

Results: 2343 records (2296 following duplicate removal)

### Search Strategy:

#1 (Infant* or infancy or Newborn* or Baby* or Babies or Neonat* or Preterm* or Prematur* or Postmatur* or Child* or Schoolchild* or School age* or Preschool* or Kid or kids or Toddler* or Teen* or Boy* or Girl* or Minors* or Pubert* or Pubescen* or Prepubescen* or Pediatric* or Paediatric* or Peadiatric* or Nursery school* or Kindergar* or Primary school* or Secondary school* or Elementary school* or High school* or Highschool*):ti,ab,kw

#2 (Adolesc*):ti,ab

#3 (Infant or Child or Minors or Puberty or Pediatrics or Schools):kw

#4 #1 or #2 or #3

#5 adolescent*:kw

#6 (adolescent* and (adult* or elderly or "middle aged" or "aged, 80 and over")):kw

#7 #6 and not #4

#8 #4 or #5

#9 #8 and not #7 from 2012 to 2012, in Trials
